# Supplementary material for: Membrane associated collagen XIII promotes cancer metastasis and enhances anoikis resistance
Source: Springer Nature journal article supplement (doi:10.1186/s13058-018-1030-y), 2018-10-01
Supplement: MOESM4 [file 16165378]

Figure S4.

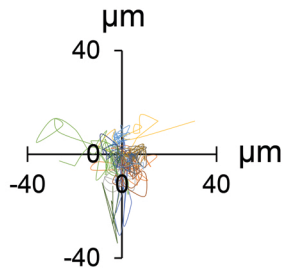

Ctrl

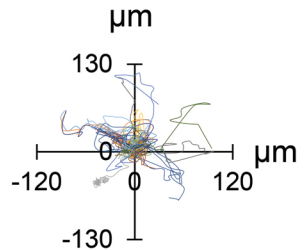

Col13
