# Supplementary material for: Membrane associated collagen XIII promotes cancer metastasis and enhances anoikis resistance
Source: Springer Nature journal article supplement (doi:10.1186/s13058-018-1030-y), 2018-10-01

Figure S5.

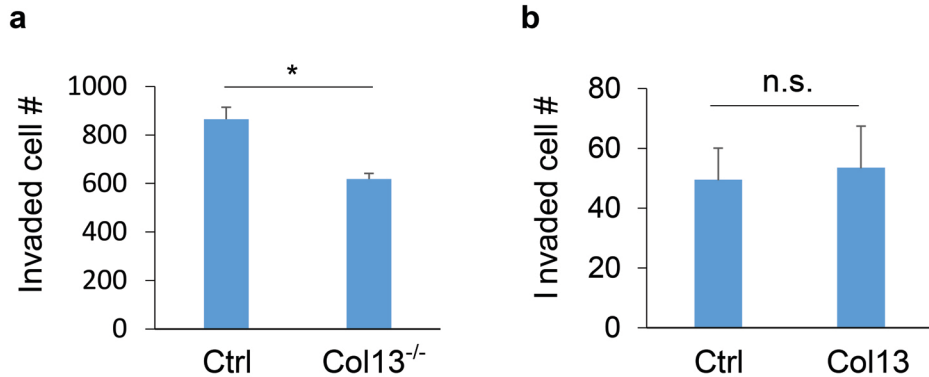

Supplement: MOESM5 [file 16165378]
