# Supplementary material for: Membrane associated collagen XIII promotes cancer metastasis and enhances anoikis resistance
Source: Springer Nature journal article supplement (doi:10.1186/s13058-018-1030-y), 2018-10-01
Supplement: MOESM6 [file 16165378]

Figure S6.

Wild type MDA-MB-231  
GFP-MDA-MB-231-VecCtrl  
GFP-MDA-MB-231-Col13<sup>-/-</sup>

+  
+  
-

-  
-  
+

+  
-  
+

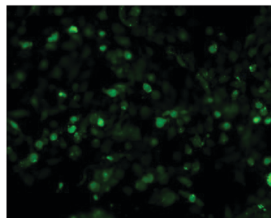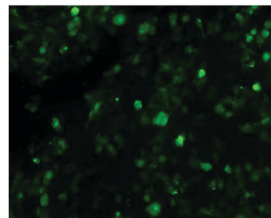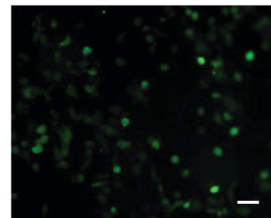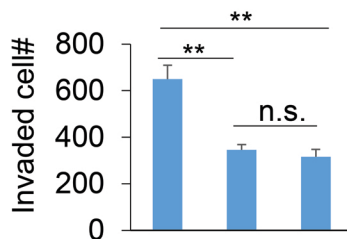

Wild type MDA-MB-231  
GFP-MDA-MB-231-VecCtrl  
GFP-MDA-MB-231-Col13<sup>-/-</sup>

+ - +  
+ - -  
- + +
